# Supplementary material for: Screening and evaluation of the role of immune genes of brain metastasis in lung adenocarcinoma progression based on the TCGA and GEO databases
Source: PubMed Central journal article supplement — J Thorac Dis. 2021 Aug;13(8):5016–34. doi: 10.21037/jtd-21-935 (PMC8411151; doi:10.21037/jtd-21-935), 2021-08
Supplement: jtd-13-08-5016-supplementary.pdf [file jtd-13-08-5016-supplementary.pdf]

Supplementary

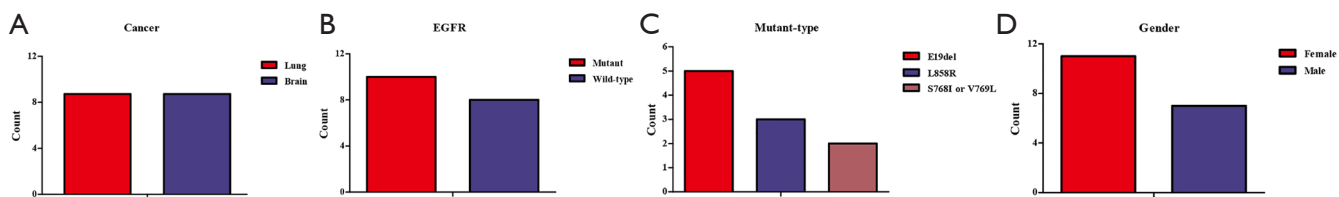

**Figure S1** General information of patients with LUAD and brain metastases in the GSE161116 data set. (A) LUAD and LUAD brain metastases tissues; (B) EGFR mutant and wild-type; (C) Mutant-type; (D) Sex. Note: LUAD, lung adenocarcinoma.

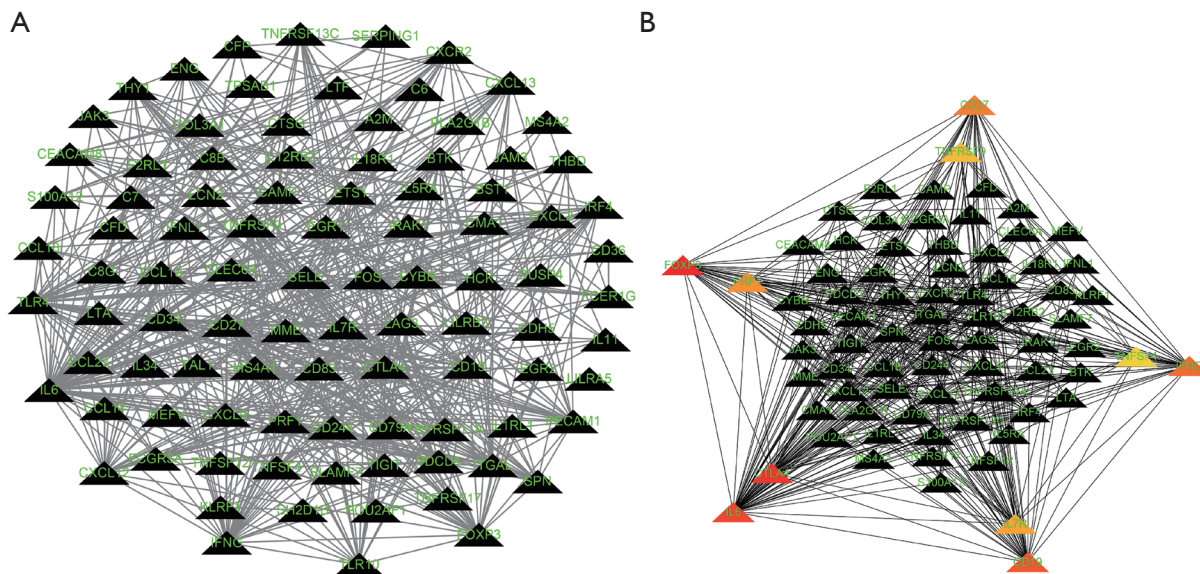

**Figure S2** The PPI network of 97 DEGs of brain metastasis. (A) PPI network; (B) Hub genes of the PPI network. Note: DEGs, differentially expressed genes; PPI, protein and protein interaction.

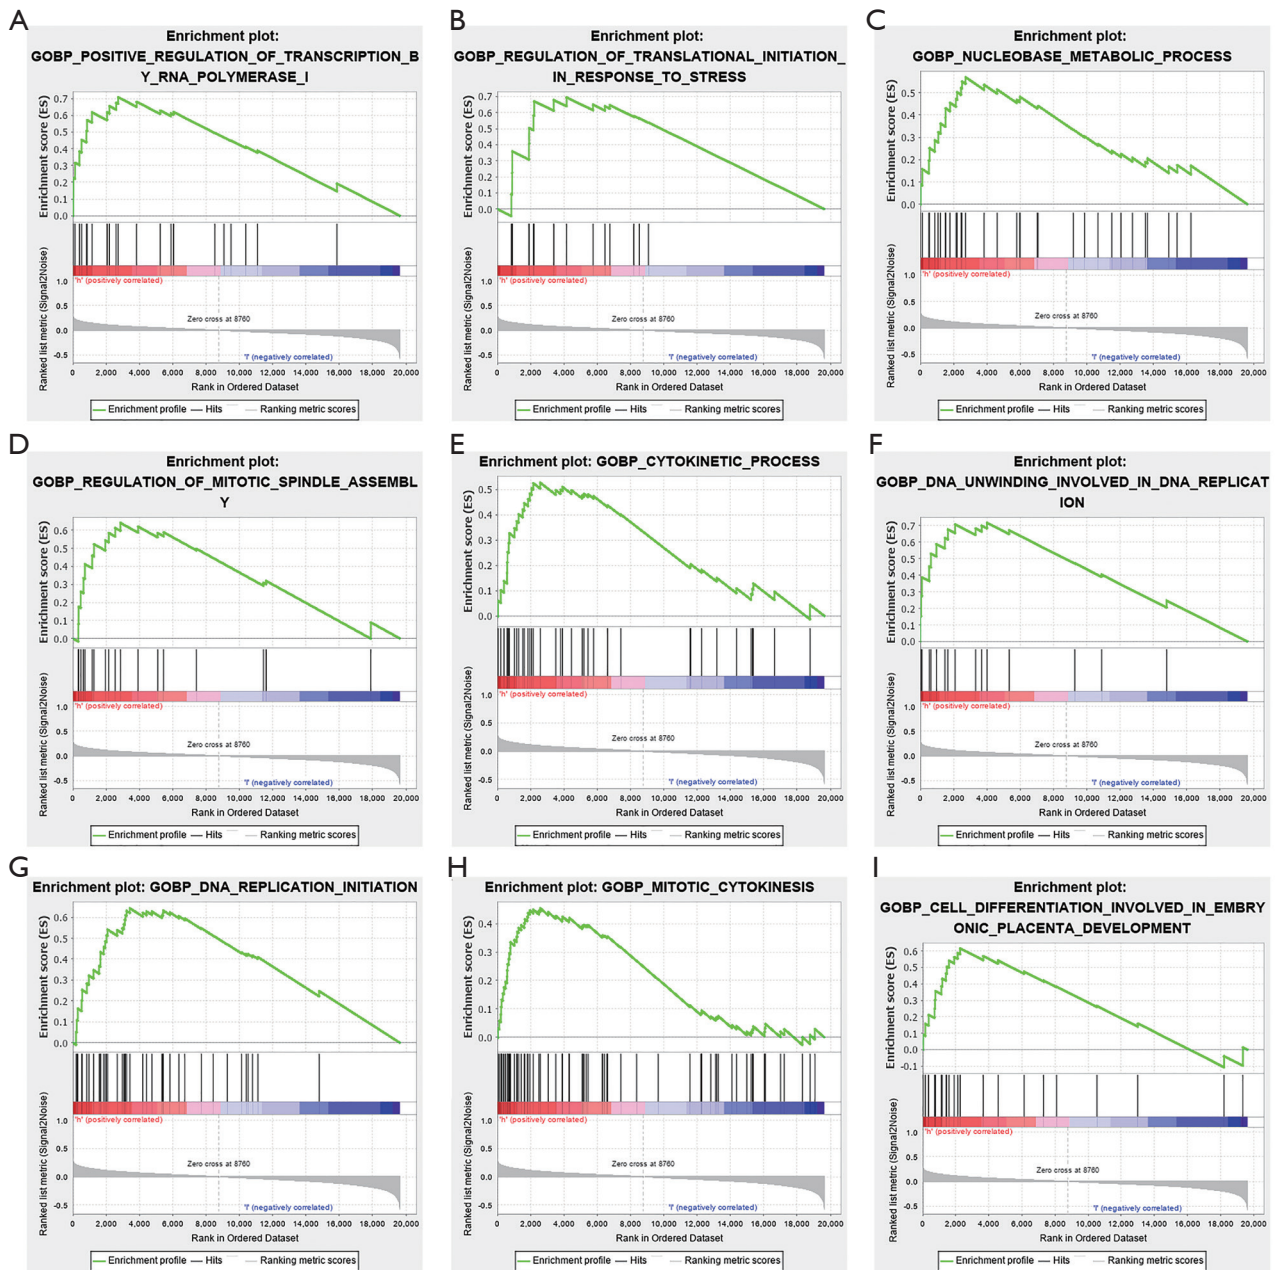

**Figure S3** The biological functions involved in the risk model via GSEA (BP). Note: GSEA, gene set enrichment analysis; BP, biological processes.

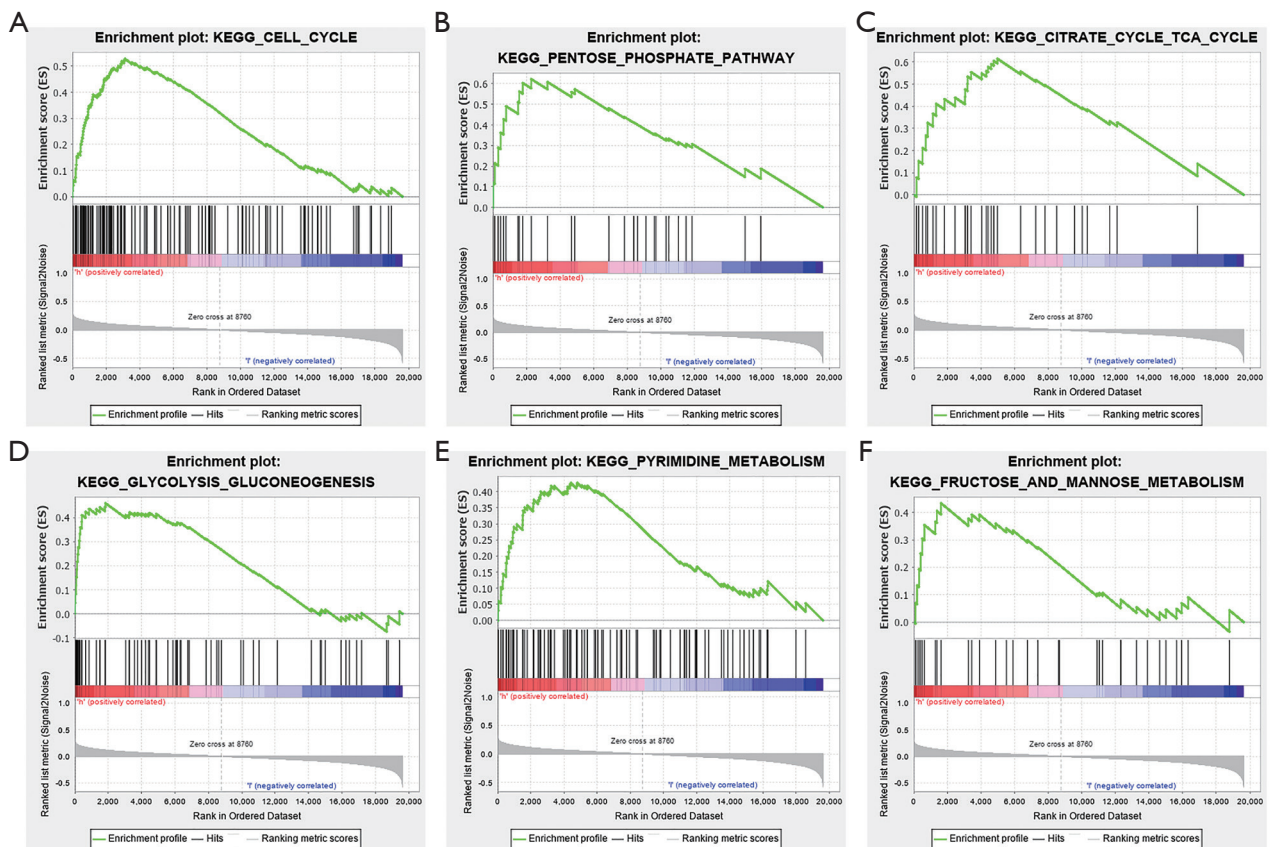

**Figure S4** The signaling mechanisms involved in the risk model via GSEA (KEGG). Note: GSEA, gene set enrichment analysis; KEGG, Kyoto Encyclopedia of Genes and Genomes.
